# Supplementary material
Source: PubMed Central journal article supplement (PMC3652913)
Supplement: NIHMS434463-supplement-502AF08A0F3A24703D52E565BFA134F6.pdf [file NIHMS434463-supplement-502AF08A0F3A24703D52E565BFA134F6.pdf]

## **SUPPLEMENTARY MATERIALS**

### **Migratory properties of pulmonary dendritic cells are determined by their developmental lineage**

Hideki Nakano, Joseph E. Burgents, Keiko Nakano, Gregory S. Whitehead, Cheolho  
Cheong, Carl D. Bortner and Donald N. Cook

This file includes Supplementary Figures S1 through S5

Figure S1

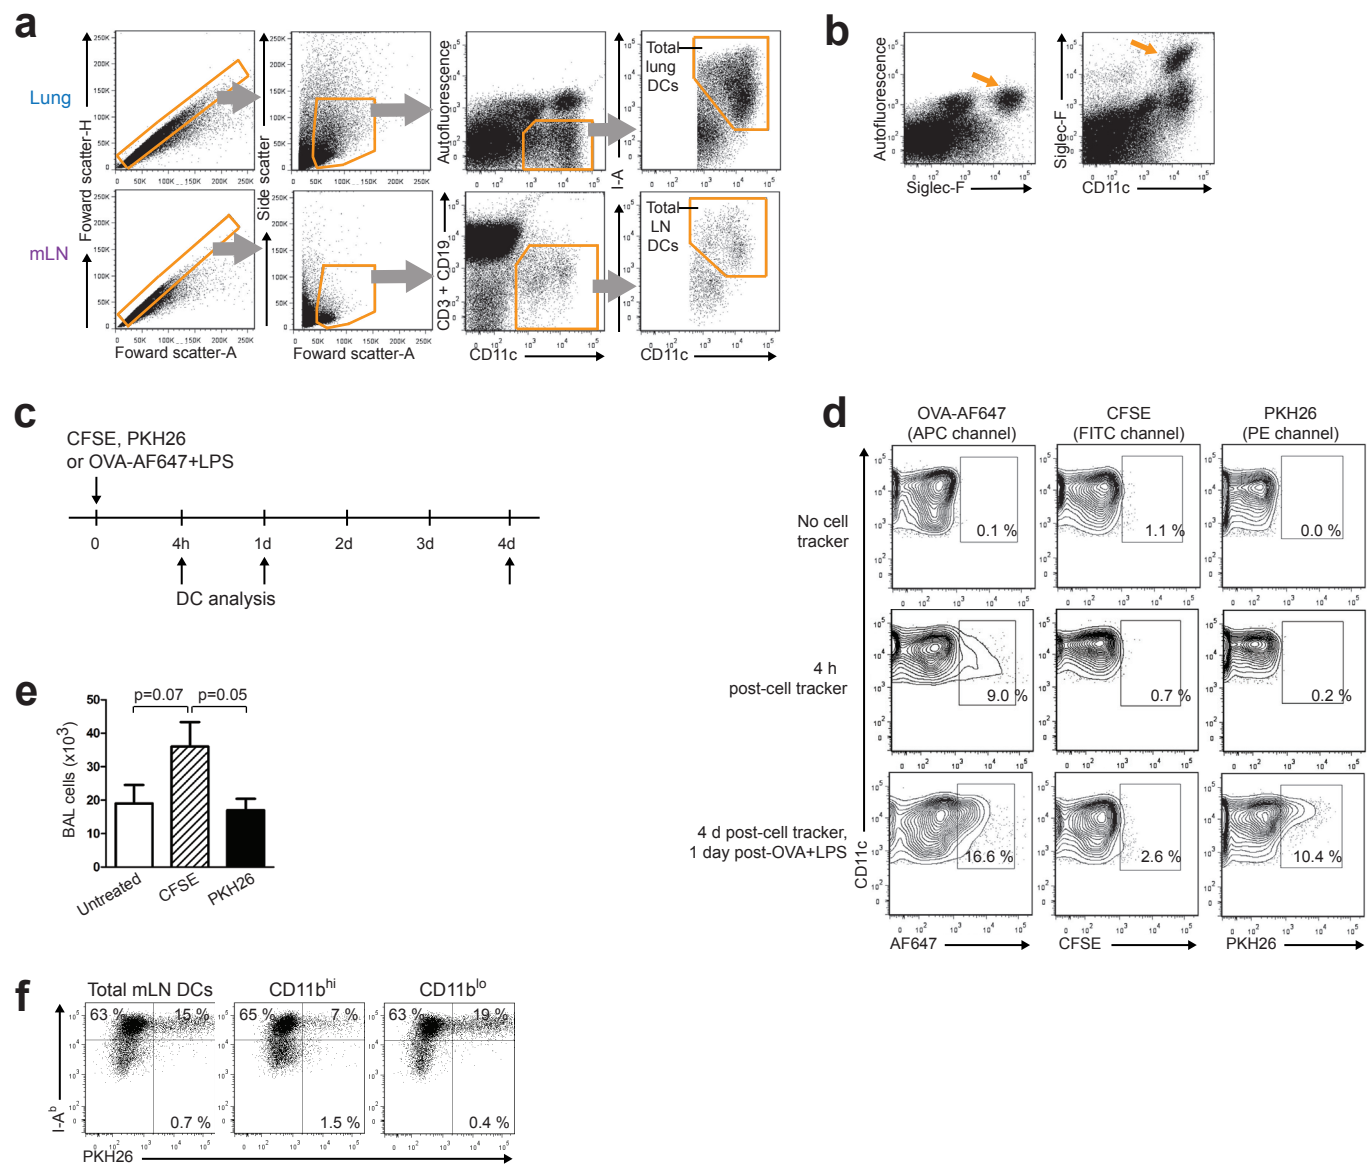

**Supplementary Figure S1.** Gating strategy for lung and mLN DCs, and use of fluorescent dyes for tracking DC migration. **(a)** Low density cells from the lung gated on autofluorescence<sup>lo</sup> I-A<sup>+</sup>CD11c<sup>+</sup> cells (top), and low density cells from mLNs gated on CD3<sup>lo</sup>CD19<sup>lo</sup>I-A<sup>+</sup>CD11c<sup>+</sup> cells (bottom). **(b)** Comparison of autofluorescence and anti-Siglec-F antibody staining to distinguish macrophages from lung DCs. Arrow indicates alveolar macrophages **(c)** Timeline to measure staining of DCs in the lung by CFSE or PKH26, and transport of OVA-AF647 to LNs after DC activation with co-instilled LPS. **(d)** Analysis of stained DCs in mediastinal LNs at the indicated times post-cell tracker and OVA/LPS instillation. **(e)** Airway inflammation induced by instilling CFSE or PKH. Shown are total leukocytes in bronchoalveolar lavage fluid 1 d after instillation of the respective dyes. *P*-value by Mann Whitney test. (*n*=5) **(f)** I-A staining of PKH<sup>+</sup> mLN DCs.

**a** *Ccr7*<sup>+/+</sup> BMDC *Ccr7*<sup>-/-</sup> BMDC

on ice

37 °C

Relative cell number

CCR7

--- rat IgG<sub>2a</sub> — CCR7 mAb

0.4 % 0.2 %

24.4 % 2.3 %

**b** Lung CD11c<sup>+</sup>I-A<sup>+</sup>Auto<sup>-</sup>

on ice

37 °C

Relative cell number

CCR7

--- rat IgG<sub>2a</sub> — CCR7 mAb

0.1 % 2.8 %

**c** Lung CD11c<sup>+</sup>I-A<sup>+</sup>Auto<sup>-</sup>

On ice

37 °C

Relative cell number

MHC-II (I-A)

3342 (MFI) 8360 (MFI)

**d** Lung CD11b<sup>+</sup>

on ice

37 °C

Relative cell number

MHC-II (I-A)

12.7 % 1.9 %

**e** Lung CD11c<sup>+</sup>I-A<sup>+</sup>Auto<sup>-</sup>

steady state

OVA-LPS

on ice

37 °C

Relative cell number

CCR7-GFP

--- *Ccr7*<sup>+/+</sup> — *Ccr7*<sup>gfp/+</sup>

1.3 % 4.6 %

1.0 % 4.8 %

**f** *Ccr7* genomic locus

5' probe

ATG

TAA

3' probe

**g** *CCR7*-gfp targeting vector

3LoxP3NwCD/NIEHS33 ~ 17.3 kb

5' arm: ~ 4.5 kb

KI region: ~ 0.7 kb

3' arm: ~ 5.6 kb

**h** targeted genomic locus

**i** 3' probe (BglII digest of genomic DNA)

WT allele 15.7 kb

recombinant allele 12.4 kb

23.1 kb

9.4 kb

← WT allele

← targeted allele

B=BamHI; Bg=BglII; E=EcoRI; H=HindIII; K=KpnI; RV=EcoRV; SI=Sal I; Sm=SmaI; Sp=SpeI; X=XbaI;

1 kb

LoxP site

mCCR7 exon

GFP cDNA

Probe

**Supplementary Figure S2.** Flow cytometric analyses of cells using either anti-CCR7 monoclonal antibodies or *Ccr7<sup>gfp</sup>* mice, and generation of *Ccr7<sup>gfp</sup>* reporter mice. **(a)** *In vitro* generated BMDCs (9 days of culture) from wild-type or *Ccr7<sup>-/-</sup>* mice were stained with PE-labeled anti-CCR7 mAbs on ice or at 37 °C. Data shown are for gated CD11c<sup>+</sup>I-A<sup>+</sup>CD86<sup>+</sup> cells. **(b)** Lung DCs (CD11c<sup>+</sup>I-A<sup>+</sup> autofluorescence<sup>lo</sup>) from untreated C57BL/6 mice stained with anti-CCR7 mAbs on ice or at 37 °C. **(c)** MHC class II staining of lung DCs on ice or at 37 °C. **(d)** Staining for CD115 on I-A<sup>+</sup>CD11b<sup>+</sup> monocytes after on ice or at 37 °C. **(e)** CCR7-GFP fluorescence in lung DCs from untreated *Ccr7<sup>gfp/+</sup>* mice. **(f)** Structure of the wild-type *Ccr7* locus is shown, with exons in orange, regions used to generate homology in blue. **(g)** Structure of targeting vector. 5' and 3' arms of homology (blue) and GFP coding region (red) are shown. DTA, diphtheria toxin-encoding DNA. **(h)** Structures of targeted *Ccr7* locus. **(i)** Southern blot confirmation of correctly targeted C57BL/6-derived embryonic stem (ES) cells. Neomycin (*neo*)-resistant ES cell colonies were screened by PCR and the expected structure of the targeted locus confirmed by Southern blotting using genomic DNA residing lying outside of the region used to generate arms of homology. The targeted *Ccr7* allele includes the selectable *neo* gene flanked by LoxP sites to allow its deletion from targeted cell lines by *Cre* recombinase. This deletion event was confirmed by PCR-based analysis of genomic DNA following transfection of correctly targeted, *neo*-sensitive cell lines with *cre*-expressing plasmid DNA (data not shown).

Figure S3

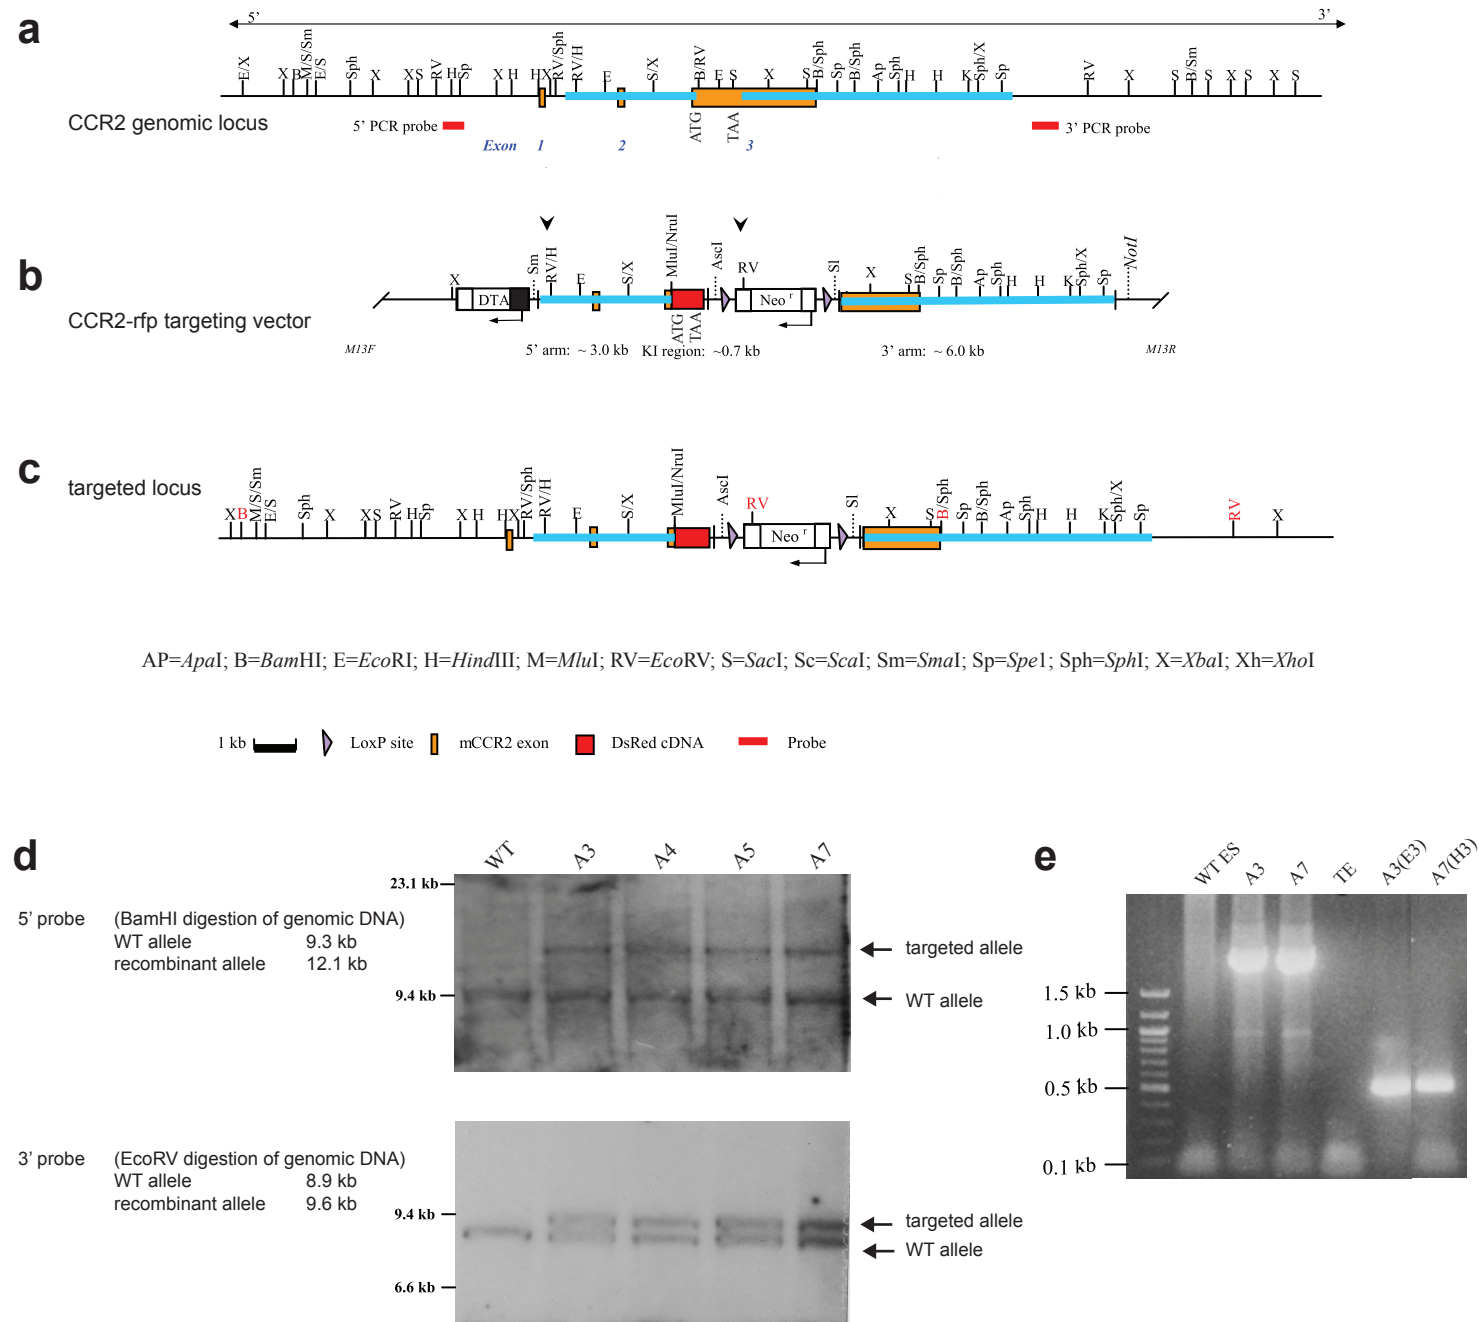

**Supplementary Figure S3.** Generation of *Ccr2* null mice. (a) *Ccr2* locus with exons in orange and regions of homology in blue. (b) Structure of targeting vector. DTA; diphtheria toxin. (c) Structure of targeted locus. (d) Representative Southern blots showing confirmation of correctly targeted ES cells using 5' and 3' probes. (e) PCR-based assay showing *Cre* recombinase-mediated excision of the *neo* gene from two independently targeted ES cell clones. The 2.5 kb band corresponds to the *neo*-containing gene, and the 0.5 kb band corresponds to cells having an excised *neo* gene. In addition to the homology arms, the final vector also contains the *neo* expression cassette (for positive selection of the ES cells) flanked by LoxP sequences (for the subsequent removal of the *neo* cassette), and a DTA expression cassette for negative selection of the ES cells. RFP fluorescence was undetectable in the targeted cells, and the mice were used as non-reporter, gene targeted animals.

Figure S4

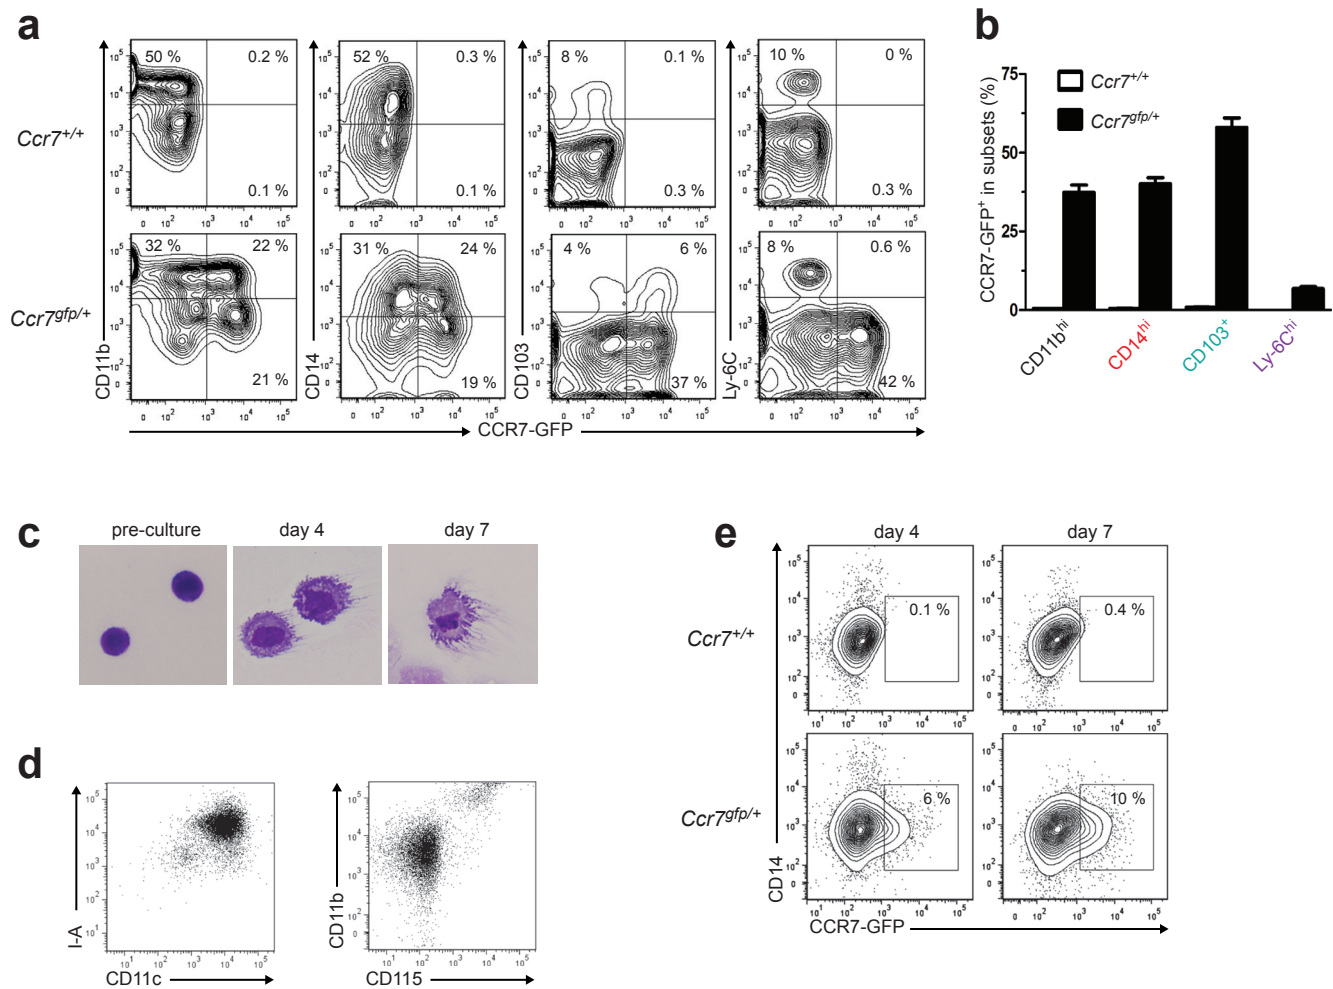

**Supplementary Figure S4.** *Ccr7-gfp* expression in moDCs from skin-draining LNs and in bone marrow monocytes-derived DCs. (a) Cytograms showing *Ccr7-gfp* expression in CD11c<sup>+</sup>I-A<sup>+</sup> DCs isolated from skin-draining LNs 24 h after i.v. injection of LPS. (b) Compiled data of CCR7-GFP<sup>+</sup> cells in the indicated subpopulations of DCs from skin-draining LNs (n=3). (c-e) Bone marrow monocyte-derived DCs. Ly-6C<sup>hi</sup>CD11b<sup>hi</sup> inflammatory monocytes were purified from bone marrow and cultured for up to 7 days in media containing GM-CSF and IL-4. (c) Representative images of cells after the indicated number of culture days photographed with a 40x objective. (d) Surface marker display of cells after 4 days of culture. (e) *Ccr7-gfp* expression in cells after 4 or 7 days of culture.

Figure S5

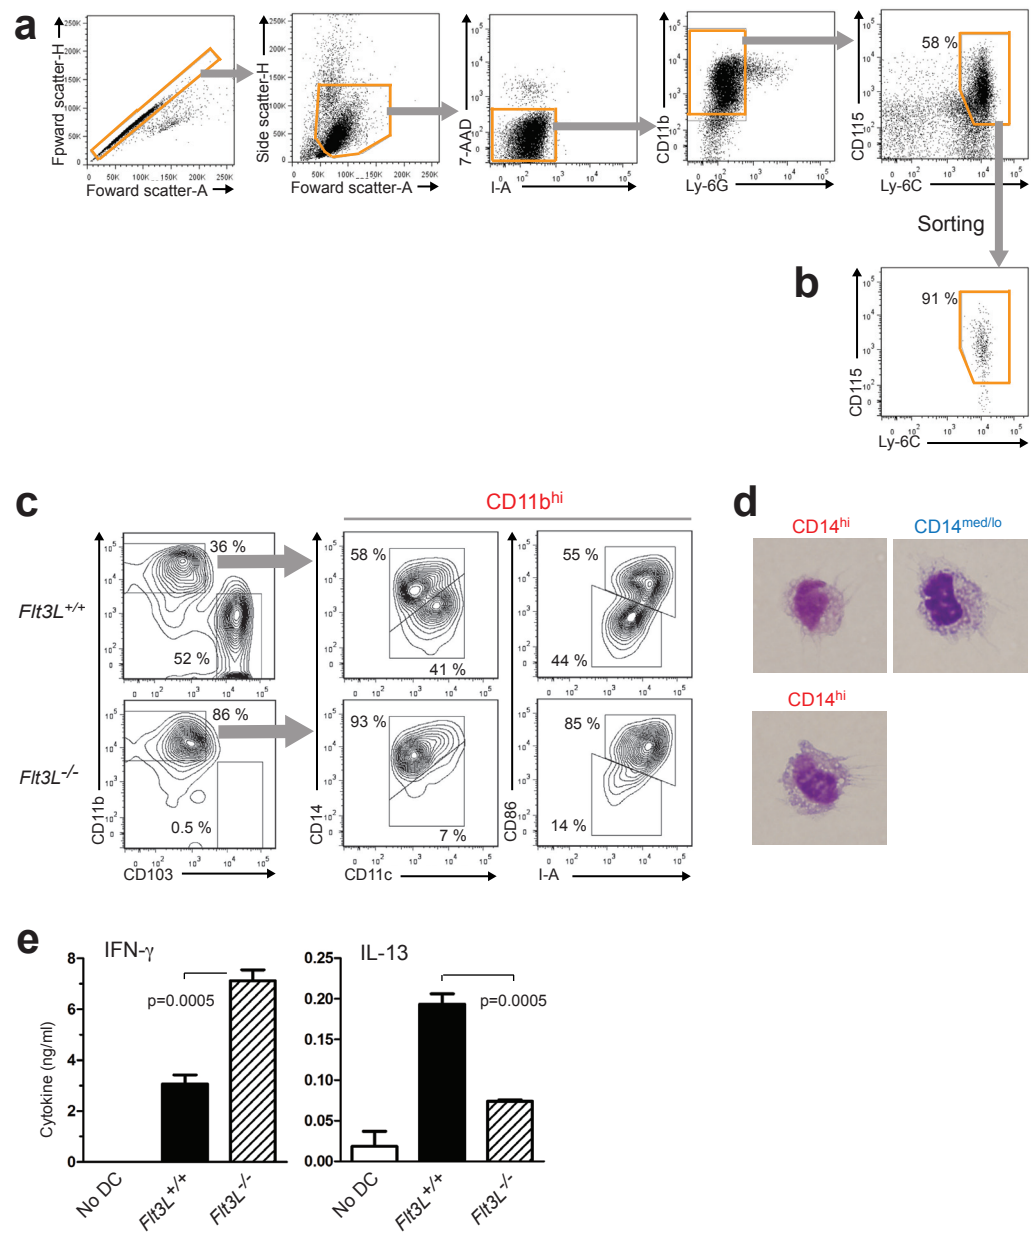

**Supplementary Figure S5.** Purification of bone marrow monocytes and analysis of lung CD11b<sup>hi</sup> DCs in *Flt3L*<sup>-/-</sup> mice. (a) Gating strategy for CD11b<sup>+</sup>CD115<sup>+</sup>Ly-6C<sup>hi</sup> monocyte purification by flow cytometry. CD11c<sup>+</sup>, I-A<sup>+</sup>, and Ly-6G<sup>+</sup> cells were depleted by magnet activated cell sorter prior to flow cytometry-based cell sorting. (b) Purity of CD115<sup>+</sup>Ly-6C<sup>hi</sup> monocytes after cell sorting. (c) FACS profiles of lung DC subsets in wild-type and *Flt3L*<sup>-/-</sup> mice. CD11b<sup>hi</sup> DCs were further analyzed with CD14 and CD11c staining, and I-A and CD86 staining. (d) Images of CD14<sup>hi</sup>CD11c<sup>int</sup> DCs and CD14<sup>med/lo</sup>CD11c<sup>hi</sup> DCs from lung of wild-type or *Flt3L*<sup>-/-</sup> mice photographed using a 60x objective lens. (e) Th1 and Th2 differentiation of naïve T cells induced by lung DCs. Wild-type and *Flt3L*<sup>-/-</sup> mice were instilled with OVA/LPS and lungs excised 16 h later. CD11c<sup>+</sup>I-A<sup>+</sup>autofluorescence<sup>lo</sup> total DCs were purified by flow cytometry then cultured with OVA-specific OT-II CD4<sup>+</sup> T cells for 5 days. T cell responses were elicited by the incubation of cultured T cells in an anti-CD3 $\epsilon$  and anti-CD28 mAb-coated plate for 24 h. IFN- $\gamma$  and IL-13 in the supernatants were measured by ELISA to estimate Th1 and Th2 differentiation, respectively.
